# Supplementary material
Source: PubMed Central journal article supplement (PMC8356143)
Supplement: jamacardiol-e213471-s001.pdf [file jamacardiol-e213471-s001.pdf]

## Supplemental Online Content

Dionne A, Sperotto F, Chamberlain S, et al. Association of myocarditis with BNT162b2 messenger RNA COVID-19 vaccine in a case series of children. *JAMA Cardiol*. Published online August 10, 2021.  
doi:10.1001/jamacardio.2021.3471

**eFigure 1.** A), Peak Global Circumferential and B) Peak Global Longitudinal Strain During Hospital Admission and Follow-up

**eFigure 2.** Cardiac Magnetic Resonance Short and Long-Axis Views Showing Late Gadolinium Enhancement in the Basal Inferolateral Left Ventricular Segment

**eTable.** Detailed Characteristics of Patients With Myocarditis Following COVID-19 Vaccine

This supplemental material has been provided by the authors to give readers additional information about their work.

eFigure 1.A) Peak global circumferential and B) Peak global longitudinal strain during hospital admission and follow-up

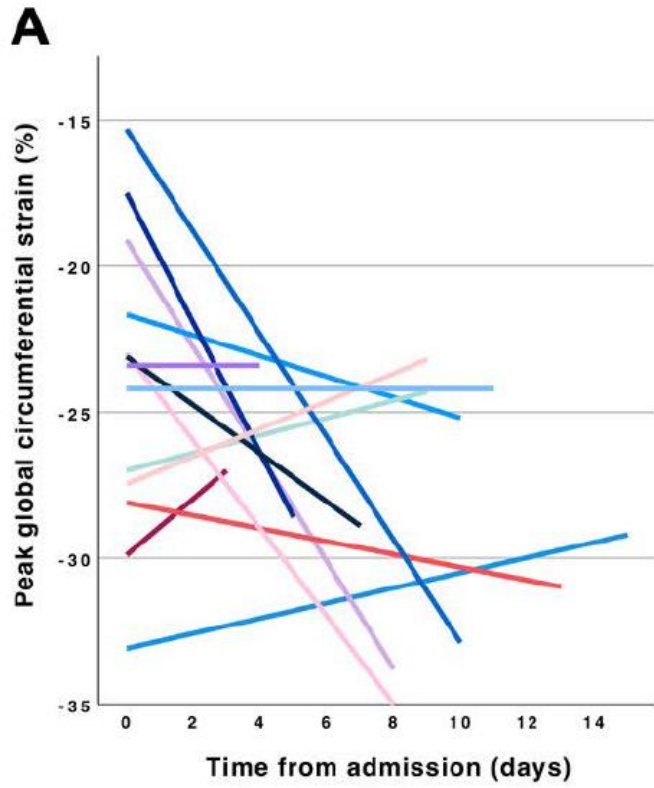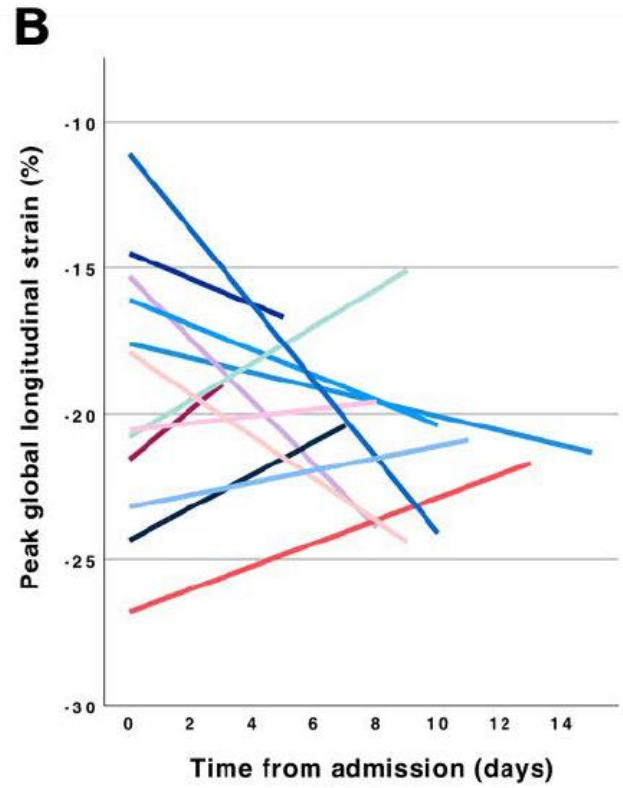

eFigure 2. Cardiac magnetic resonance short and long-axis views showing late gadolinium enhancement in the basal inferolateral left ventricular segment.

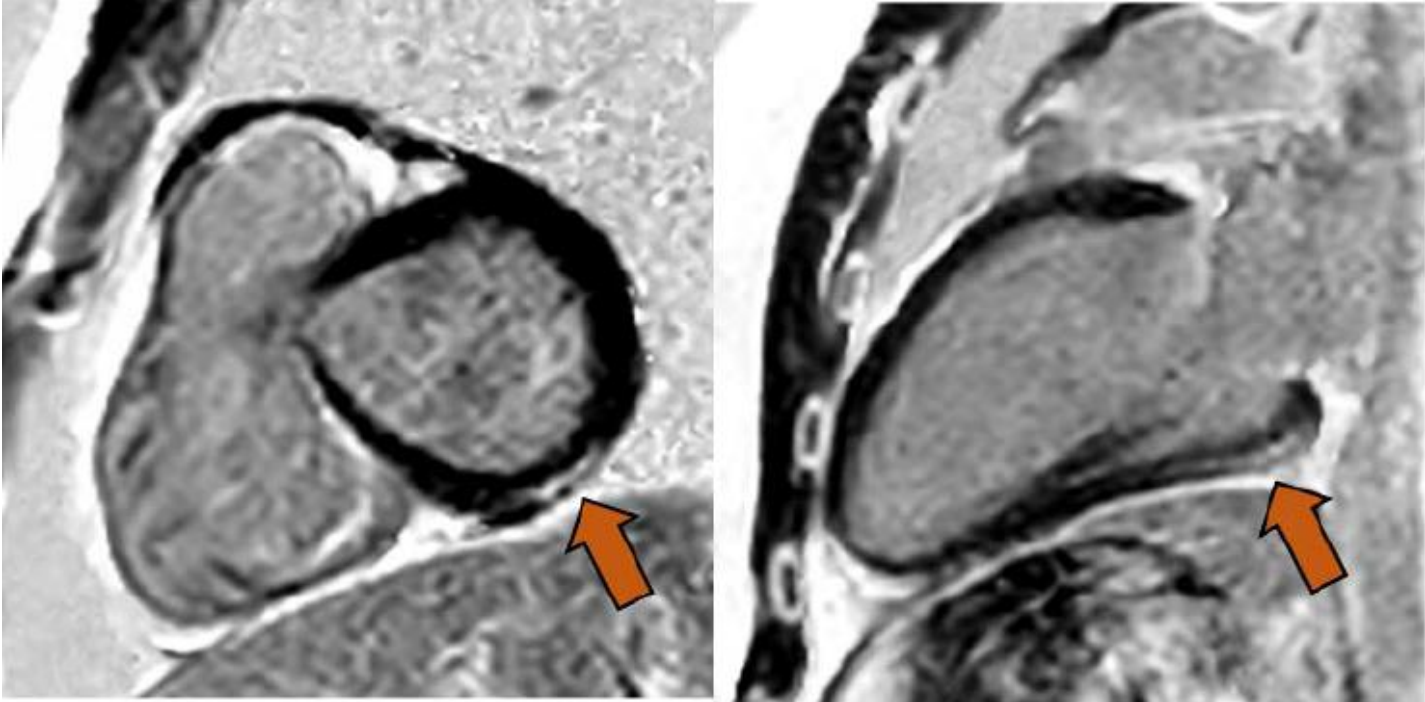

eTable. Detailed characteristics of patients with myocarditis following COVID-19 vaccine

| Patient                                        | 1                                                         | 2            | 3                                               | 4                                                               | 5                                            | 6                                    | 7                           | 8                                                                  | 9                                                | 10                                       | 11                  | 12                                   | 13                         | 14                                            | 15                            |
|------------------------------------------------|-----------------------------------------------------------|--------------|-------------------------------------------------|-----------------------------------------------------------------|----------------------------------------------|--------------------------------------|-----------------------------|--------------------------------------------------------------------|--------------------------------------------------|------------------------------------------|---------------------|--------------------------------------|----------------------------|-----------------------------------------------|-------------------------------|
| Gender                                         | M                                                         | M            | M                                               | F                                                               | M                                            | M                                    | M                           | M                                                                  | M                                                | M                                        | M                   | M                                    | M                          | M                                             | M                             |
| Vaccine dose                                   | 2nd                                                       | 1st          | 2nd                                             | 2nd                                                             | 2nd                                          | 2nd                                  | 2nd                         | 2nd                                                                | 2nd                                              | 2nd                                      | 2nd                 | 2nd                                  | 2nd                        | 2nd                                           | 2nd                           |
| Symptoms                                       | Fever, myalgia, chest pain, shortness of breath, headache | Chest pain   | Fever, myalgia, chest pain                      | Myalgia, chest pain, shortness of breath                        | Fever, chest pain                            | Fever, chest pain, myalgia, headache | Fever, chest pain, vomiting | Myalgia, chest pain, nausea, fatigue                               | Fever, chest pain, palpitations                  | Chest pain, headache                     | Chest pain, fever   | Fever, myalgia, chest pain, headache | Fever, myalgia, chest pain | Fever, fatigue, myalgia, chest pain, headache | Chest pain, headache, fatigue |
| Day onset symptoms after vaccine               | 2                                                         | 4            | 1                                               | 2                                                               | 3                                            | 2                                    | 3                           | 2                                                                  | 1                                                | 3                                        | 4                   | 6                                    | 4                          | 2                                             | 3                             |
| Troponin level at presentation (ng/mL)         | 0.12                                                      | 0.12         | 0.57                                            | 0.08                                                            | 0.55                                         | 0.18                                 | 0.43                        | 0.08                                                               | 1.14                                             | 0.13                                     | 0.19                | 1.08                                 | 0.25                       | 3.15                                          | 1.00                          |
| CRP (mg/dL)                                    | 1.71                                                      | 5.24         | 2.07                                            | 7.61                                                            | 0.69                                         | 1.54                                 | NA                          | 7.43                                                               | 10.00                                            | 3.00                                     | 1.59                | 7.52                                 | 2.74                       | 3.01                                          | 7.69                          |
| <u>ECG hospitalization</u>                     | NSSTTWC                                                   | ST elevation | ST elevation, T wave inversion                  | NSSTTWC                                                         | ST elevation                                 | Normal                               | Normal                      | ST elevation, T wave inversion                                     | ST elevation                                     | PACs                                     | ST elevation        | ST elevation                         | Normal                     | ST elevation, NSVT                            | ST elevation                  |
| <u>Echocardiogram</u>                          |                                                           |              |                                                 |                                                                 |                                              |                                      |                             |                                                                    |                                                  |                                          |                     |                                      |                            |                                               |                               |
| Ejection fraction                              | 59.3                                                      | 58.3         | 58.9                                            | 55.0                                                            | 59.7                                         | Normal                               | 64.7                        | 43.7                                                               | 53.2                                             | 60.8                                     | 55.1                | 55.2                                 | 61.2                       | 59.0                                          | 48.7                          |
| Circumferential strain Z-score                 | 1.10                                                      | 0.80         | -1.00                                           | -3.00                                                           | -1.90                                        | -1.80                                | -0.03                       | -3.50                                                              | -4.00                                            | -1.80                                    | -2.30               | -0.70                                | -0.60                      | -1.60                                         | -2.59                         |
| Longitudinal strain Z-score                    | -0.49                                                     | -1.30        | -0.34                                           | -1.91                                                           | -0.03                                        | 0.90                                 | -0.07                       | -2.56                                                              | -3.31                                            |                                          | -2.05               | -1.37                                | 1.78                       | 0.44                                          | -2.10                         |
| Diastolic dysfunction                          | N                                                         | N            | N                                               | N                                                               | N                                            | N                                    | N                           | N                                                                  | Y                                                | N                                        | N                   | Y                                    | N                          | N                                             | Y                             |
| <u>cMRI</u>                                    |                                                           |              |                                                 |                                                                 |                                              |                                      |                             |                                                                    |                                                  |                                          |                     |                                      |                            |                                               |                               |
| Late gadolinium enhancement                    | N                                                         | N            | Basal and mid-septum, inferior and posterior LV | LV midwall at junction anterolateral and inferolateral segments | Inferolateral, anterolateral, inferior walls | Basal inferolateral segment          | N                           | Basal inferior and anterior, anterolateral midwall, apical lateral | Anterolateral and inferolateral, apical inferior | Basal inferior and inferior-lateral wall | Basal inferolateral | LV free wall                         | Basal inferolateral LV     | Inferior basal and apical anterior free wall  | Lateral free wall             |
| Regional hyperintensity on T2-weighted imaging | N                                                         | N            | N                                               | N                                                               | N                                            | N                                    | NA                          | N                                                                  | N                                                | N                                        | N                   | N                                    | N                          | Y                                             | Y                             |
| ECV fraction (%)                               | 29                                                        | 25           | 29                                              | 28                                                              | 27                                           | 22                                   | 31                          | 28                                                                 | 26                                               | 24                                       | 24                  | 32                                   | 27                         | 23                                            | 37                            |
| LV global T2 (ms)                              | 53.4                                                      | 51.5         | 53.3                                            | 53.5                                                            | 47.0                                         | 51.0                                 | 57.6                        | 53.4                                                               | 51.4                                             | 49.4                                     | 49.0                | 54.7                                 | 49.8                       | 47.2                                          | 51.5                          |

|                                     |         |         |        |         |               |        |         |               |               |                  |               |                             |        |               |                  |
|-------------------------------------|---------|---------|--------|---------|---------------|--------|---------|---------------|---------------|------------------|---------------|-----------------------------|--------|---------------|------------------|
| LV global native T1 (ms)            | 1084    | 1040    | 1062   | 1106    | 993           | 1060   | 1078    | 1121          | 1048          | 1017             | 985           | 1089                        | 1015   | 963           | 1012             |
| Immunomodulatory treatment          | N       | N       | N      | N       | IVIG Steroids | N      | N       | IVIG Steroids | IVIG Steroids | IVIG Steroids    | IVIG Steroids | N                           | N      | IVIG Steroids | IVIG Steroids    |
| Hospital LOS (days)                 | 2       | 2       | 2      | 2       | 3             | 1      | 1       | 3             | 4             | 2                | 3             | 2                           | 2      | 5             | 5                |
| <u>Follow-up</u>                    |         |         |        |         |               |        |         |               |               |                  |               |                             |        |               |                  |
| Persistent symptoms                 | Fatigue | N       | N      | Fatigue | Chest pain    | N      | N       | N             | N             | Fatigue          | N             | N                           | N      | N             | N                |
| Troponin level at follow-up (ng/mL) | NA      | 0.01    | 0.01   | 0.01    | 0.01          | 0.01   | 0.16    | 0.02          | 0.01          | 0.05             | 0.01          | 0.01                        | 0.01   | 0.01          | 0.01             |
| ECG follow-up                       | NA      | NSSTTWC | Normal | Normal  | Normal        | Normal | NSSTTWC | Normal        | NSSTTWC       | T-wave inversion | Normal        | T-wave inversion            | Normal | NSSTTWC       | T-wave inversion |
| Echocardiogram follow-up (EF)       | NA      | 59.3    | 56.0   | 55.7    | 65.3          | 71.5   | 59.0    | 62.9          | 61.2          | 63.1             | 57.3          | 54.4, diastolic dysfunction | 66.2   | 59.3          | 55.3             |

M: Male, F: Female, Y:Yes, N: No, NA: not available, CRP: C-reactive protein, ECG: electrocardiogram, NSSTTWC: non-specific ST-T wave changes, cMRI: cardiac MRI, ECV: Extracellular volume fraction, LV: left ventricle

Individual ages are not included to protect patient identity. Ages ranged from 12 to 18 years.
